# Supplementary material
Source: MDPI journal article supplement (https://www.mdpi.com/2411-5142/3/1/8)
Supplement: s1 [file s1]

## Appendix B - Overview of the selected studies by publication date

| References                           | Dependent Variables |     |     |       | Measurement Times<br>(weeks or days)  | Sample size<br>(n)                                                                               | Mean age<br>(years) | Main results (*Particularities)                                                                                                                                                                                                                                                                                                                                                                |
|--------------------------------------|---------------------|-----|-----|-------|---------------------------------------|--------------------------------------------------------------------------------------------------|---------------------|------------------------------------------------------------------------------------------------------------------------------------------------------------------------------------------------------------------------------------------------------------------------------------------------------------------------------------------------------------------------------------------------|
|                                      | BRT                 | RT  | MT  | Force |                                       |                                                                                                  |                     |                                                                                                                                                                                                                                                                                                                                                                                                |
| Spalding, T.J.W.<br>et al. (1994)    | Yes                 | Yes | Yes | Yes   | Before, 4, 6, 8 and 10<br>weeks after | n=29 (18 drivers; 11<br>non drivers)<br>. 20 right TKA<br>. 9 left TKA                           | 74<br>(61-83)       | Right TKA:<br>- RT remained unchanged at 4weeks<br>- MT was 50% increased at 4 weeks; at 8 weeks returned to pre-op values<br>Left TKA:<br>- BRT, RT and MT remained unchanged 4 weeks after surgery.<br>*High drop-out rates: 27.5% started the study but did not finish it.<br>*From 29 subjects included for analysis, 11 have been non-drivers.                                            |
| Pierson, J.L.<br>et al. (2003)       | Yes                 | No  | No  | No    | Before, 3, 6 and 9<br>weeks after     | n= 31 (17M; 14W)<br>. 13 bilateral TKA<br>. 18 unilateral TKA:<br>- 12 right TKA<br>- 6 left TKA | 68.6<br>(±7.6)      | BRT:<br>- 12.5% quicker response at 6 weeks<br>- 17.5% quicker response at 9 weeks<br>* Since 3x4 ANOVA revealed no significant differences in average BRT x<br>laterality of TKA, the authors have collapsed all patients across the variable<br>“side of surgery” for all statistical analysis. For this reason the results are<br>probably biased.                                          |
| Marques, C.J.<br>et al. (2008)       | Yes                 | Yes | Yes | No    | Before, 10 and 30 days<br>after       | n=21<br>. 21 right TKA:<br>(9M; 12W)                                                             | 69.1<br>(±7.8)      | Right BRT:<br>- was 9.01% increased at 10 days<br>- was still 1.7% increased at 30 days (statistically not significant)<br>RT:<br>- no significant differences across the measurements<br>MT:<br>- was significantly increased at 10 days<br>- at 30 days it was still significantly increased<br>- high drop out rates (22% were not assessed at the 3 <sup>rd</sup> measurement)             |
| Marques, C.J.<br>et al. (2008)       | Yes                 | Yes | Yes | No    | Before, 10 and 30 days<br>after       | n=24<br>. 24 left TKA<br>(13M; 11W)                                                              | 63.2<br>(±8.5)      | Left TKA:<br>- BRT, RT and MT were not affected 10 days after surgery                                                                                                                                                                                                                                                                                                                          |
| Liebensteiner, M.C.<br>et al. (2010) | Yes                 | No  | No  | No    | Before, 2 and 8 weeks<br>after        | n= 31 (14M, 17W)<br>. 13 right TKA<br>. 18 left TKA<br>Control group<br>n= 31 (12M; 19W)         | 65.7<br>(±10.2)     | Right TKA:<br>- BRT was not significant increased at 2 weeks<br>- BRT decreased significantly from 2 to 8 weeks.<br>Left TKA:<br>- BRT was not significantly increased at 2 weeks<br>- Significant decrease between 2 and 8weeks<br>*High dropout rates between Pre-Op and 2 weeks due to discomfort while<br>seating in the car simulator.<br>*Control-group was not age and gender matched.. |

|                                      |     |     |     |     |                                          |                                                                       |                                       |                                                                                                                                                                                                                                                                                                                                                                                                                                                                       |
|--------------------------------------|-----|-----|-----|-----|------------------------------------------|-----------------------------------------------------------------------|---------------------------------------|-----------------------------------------------------------------------------------------------------------------------------------------------------------------------------------------------------------------------------------------------------------------------------------------------------------------------------------------------------------------------------------------------------------------------------------------------------------------------|
| Dalury, D.F.<br>et al. (2011)        | Yes | Yes | Yes | No  | Before, 4, 6 and 8<br>weeks after        | n= 29<br>. 29 right TKA                                               | 66<br>(47-81)                         | - At 4 weeks all patients performed faster than preoperatively<br>- RT: significantly faster at 4 weeks<br>- FTT: no significant difference at 4 weeks                                                                                                                                                                                                                                                                                                                |
| Liebensteiner, M.C.<br>et al. (2014) | Yes | No  | No  | No  | Before, 1 and 6 weeks                    | n= 43(22M; 21W)<br>. 21 right TKA<br>. 22 left TKA                    | 59.8<br>( $\pm 7.5$ )                 | Right UKA (Unicompartmental knee arthroplasty):<br>- BRT was significant increased at 1 week.<br>- Baseline values were achieved at week 6<br>Left UKA:<br>- BRT was not significantly changed at 1 week<br>*High drop-out rates: 26% of the patients assessed preoperatively dropped out at 6 weeks.                                                                                                                                                                 |
| Huang, Hsuan-Ti<br>et al. (2014)     | Yes | Yes | Yes | No  | Before, 2 and 4 weeks                    | n= 14<br>. 14 right TKA:<br>(4M; 10W)                                 | 63.1<br>( $\pm 6.6$ )                 | Right TKA:<br>- BRT returned to baseline at 4 weeks at a driving speed of 50 and 70 Km/h<br>- At a driving speed of 90Km/h the BRT was still significantly increased at 4 weeks.<br>*Minimally invasive surgery (MIS) was used for all surgeries. All subjects were tested at 3 different speeds (50, 70 and 90 Km/h). The order of performing at different speeds was not randomized. Are the patients performing at a 90 Km/h speed slower as an effect of fatigue? |
| Jordan, M.<br>et al. (2015)          | Yes | Yes | Yes | Yes | Before, 8 days and 6, 12<br>and 52 weeks | n= 40<br>. 20 right TKA:<br>(10M; 10W)<br>. 20 left TKA:<br>(8M; 12W) | 69 (right<br>TKA)<br>73 (left<br>TKA) | Right TKA:<br>- BRT was significantly increased at 8 days by 30%<br>- BF was significantly decreased by 35%<br>- Baseline values were reached at week 12<br>Left TKA:<br>- BRT was not significant increased at 8 days (2%)<br>- BF was significantly decreased by 25% at 8 days<br>-BRT below baseline at week 6<br>-11% were lost to follow-up                                                                                                                      |
| Hernandez, V.H. et<br>al. (20016)    | Yes | No  | No  | No  | Before, 2, 4 and 6<br>weeks              | n= 47<br>. 47 right TKA<br>(48,3% M; 61.7%<br>W)                      | 67.5<br>( $\pm 10.0$ )                | - BRT of 39 patients (80%) was at baseline by 2 weeks<br>- 20% reached baseline by 4 weeks<br>*All patients managed with spinal anesthesia. Multimodal pain management and rapid mobilization physical therapy protocol were used.                                                                                                                                                                                                                                    |
